# Supplementary material for: 24-h Movement Guidelines and Substance Use among Adolescents: A School-Based Cross-Sectional Study
Source: MDPI journal article supplement (doi:10.3390/ijerph18063309), 2021-03-23
Supplement: s1 [file s1]

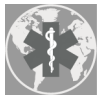

Article

# 24-h Movement Guidelines and Substance Use among Adolescents: A School-Based Cross-Sectional Study

Hugues Sampasa-Kanyinga <sup>1,2,\*</sup>, Ian Colman <sup>1,3</sup>, Gary S. Goldfield <sup>1,2</sup>, Ian Janssen <sup>4</sup>, JianLi Wang <sup>1,5</sup>, Hayley A. Hamilton <sup>6,7</sup> and Jean-Philippe Chaput <sup>1,2</sup>

**Table S1.** Descriptive characteristics of participants according to whether they were included or excluded from the statistical analyses.

|                                 | Included participants<br>(N = 10,258) | Excluded participants<br>(N= 1,177) | P value |
|---------------------------------|---------------------------------------|-------------------------------------|---------|
| Age (years)                     |                                       |                                     |         |
| Mean (95% CI)                   | 15.1 (15.0-15.3)                      | 14.3 (13.5-15.3)                    | 0.036   |
| 11-to-14-year-olds              | 37.7 (34.2-41.3)                      | 58.6 (39.6-75.3)                    | 0.030   |
| 15-to-20-year-olds              | 62.3 (58.7-65.8)                      | 41.4 (24.7-60.4)                    |         |
| Gender                          |                                       |                                     |         |
| Boys                            | 51.1 (47.9-54.3)                      | 55.1 (51.5-58.6)                    | 0.102   |
| Girls                           | 48.9 (45.7-52.1)                      | 44.9 (41.4-48.5)                    |         |
| Ethnic background               |                                       |                                     |         |
| White                           | 56.2 (51.3-61.0)                      | 48.0 (41.1-54.9)                    | 0.037   |
| Black                           | 10.0 (7.6-13.0)                       | 12.4 (6.7-21.8)                     |         |
| East/South-East Asian           | 8.8 (7.5-10.4)                        | 8.3 (5.3-12.8)                      |         |
| South Asian                     | 7.0 (5.7-8.7)                         | 4.9 (3.0-7.8)                       |         |
| Other                           | 18.0 (15.7-20.5)                      | 26.4 (20.2-33.7)                    |         |
| Subjective socioeconomic status |                                       |                                     |         |
| Mean (95% CI)                   | 6.9 (6.8-7.0)                         | 7.0 (6.6-7.4)                       | 0.862   |
| Body mass index z-score         |                                       |                                     |         |
| Mean (95% CI)                   | 0.3 (0.3-0.4)                         | 0.1 (0.0-0.2)                       | <0.001  |
| Physical activity               |                                       |                                     |         |
| Not meeting                     | 76.8 (75.3-78.2)                      | 78.7 (76.1-81.0)                    | 0.175   |
| Meeting                         | 23.2 (21.8-24.7)                      | 21.3 (19.0-23.9)                    |         |
| Screen time                     |                                       |                                     |         |
| Not meeting                     | 66.4 (64.2-68.7)                      | 72.8 (66.4-78.3)                    | 0.053   |
| Meeting                         | 33.6 (31.4-35.8)                      | 27.2 (21.7-33.6)                    |         |
| Sleep duration                  |                                       |                                     |         |
| Not meeting                     | 66.2 (64.6-67.8)                      | 55.2 (50.5-59.7)                    | <0.001  |
| Meeting                         | 33.8 (32.2-35.4)                      | 44.8 (40.3-49.5)                    |         |
| Tobacco cigarette smoking       |                                       |                                     |         |
| No                              | 92.6 (91.2-93.8)                      | 95.8 (90.9-98.1)                    | 0.135   |
| Yes                             | 7.4 (6.2-8.8)                         | 4.2 (1.9-9.1)                       |         |
| Alcohol consumption             |                                       |                                     |         |
| No                              | 55.7 (53.1-58.3)                      | 70.9 (54.8-83.0)                    | 0.060   |
| Yes                             | 44.3 (41.7-46.9)                      | 29.2 (17.0-45.3)                    |         |
| Cannabis use                    |                                       |                                     |         |
| No                              | 77.8 (75.9-79.5)                      | 84.9 (74.7-91.5)                    | 0.151   |
| Yes                             | 22.3 (20.5-24.1)                      | 15.1 (8.5-25.3)                     |         |

Data are shown as column % (95% CI), unless otherwise indicated. CI: confidence interval.

**Table S2.** Results of sensitivity analyses testing the association between combinations of adherence to movement behavior recommendations and substance use by gender.

|                 | Tobacco cigarette smoking |                     | Alcohol consumption     |                         | Cannabis use       |                         |
|-----------------|---------------------------|---------------------|-------------------------|-------------------------|--------------------|-------------------------|
|                 | Boys<br>(N= 4,431)        | Girls<br>(N= 5,805) | Boys<br>(N= 4,431)      | Girls<br>(N= 5,805)     | Boys<br>(N= 4,431) | Girls<br>(N= 5,805)     |
|                 | OR (95% CI)               | OR (95% CI)         | OR (95% CI)             | OR (95% CI)             | OR (95% CI)        | OR (95% CI)             |
| Meeting none    | 1                         | 1                   | 1                       | 1                       | 1                  | 1                       |
| PA only         | 0.55 (0.18–1.69)          | 0.74 (0.16–3.46)    | <b>1.62 (1.05–2.48)</b> | 1.16 (0.66–2.02)        | 0.90 (0.52–1.54)   | 0.59 (0.30–1.19)        |
| ST only         | 0.72 (0.34–1.50)          | 0.86 (0.30–2.48)    | 1.35 (0.83–2.20)        | 0.82 (0.50–1.36)        | 1.14 (0.73–1.79)   | 0.81 (0.51–1.29)        |
| Sleep only      | 0.99 (0.46–2.11)          | 0.55 (0.07–4.47)    | <b>0.54 (0.33–0.87)</b> | 0.77 (0.57–1.06)        | 0.90 (0.43–1.86)   | 0.94 (0.60–1.47)        |
| PA & ST only    | 0.57 (0.19–1.66)          | 0.39 (0.10–1.54)    | 1.67 (0.93–2.99)        | 1.62 (0.56–4.71)        | 0.63 (0.34–1.18)   | 1.19 (0.31–4.64)        |
| PA & sleep only | 0.40 (0.08–1.99)          | – <sup>a</sup>      | 1.19 (0.66–2.14)        | 1.53 (0.54–4.29)        | 0.55 (0.27–1.14)   | 0.36(0.06–2.25)         |
| ST & sleep only | 1.10 (0.33–3.67)          | 0.30 (0.07–1.40)    | 1.41 (0.70–2.86)        | <b>0.49 (0.32–0.76)</b> | 0.91 (0.46–1.79)   | 0.54 (0.28–1.06)        |
| Meeting all 3   | 1.49 (0.49–4.49)          | 0.78 (0.09–6.58)    | 0.79 (0.51–1.22)        | 0.71 (0.23–2.16)        | 1.00 (0.42–2.40)   | <b>0.20 (0.06–0.69)</b> |

OR: odds ratio; CI: confidence interval; PA: physical activity; ST: screen time. Models are adjusted for age, ethnicity, subjective socioeconomic status, and body mass index z-score. OR not calculated due to empty cells.

**Table S3.** Results of sensitivity analyses testing the association between combinations of adherence to movement behavior recommendations and cannabis use by age group.

|                 | 11-to-14-year-olds<br>(N= 4,871) | 15-to-20-year-olds<br>(N= 5,365) |
|-----------------|----------------------------------|----------------------------------|
|                 | OR (95% CI)                      | OR (95% CI)                      |
|                 | Meeting none                     | 1                                |
| PA only         | 0.59 (0.21–1.71)                 | 1.09 (0.68–1.77)                 |
| ST only         | 0.51 (0.14–1.80)                 | 1.04 (0.73–1.48)                 |
| Sleep only      | 0.48 (0.15–1.54)                 | 1.03 (0.59–1.81)                 |
| PA & ST only    | 0.73 (0.24–2.24)                 | 1.19 (0.61–2.32)                 |
| PA & sleep only | 0.25 (0.03–1.89)                 | 0.71 (0.42–1.21)                 |
| ST & sleep only | <b>0.61 (0.11–0.97)</b>          | 1.06 (0.64–1.75)                 |
| Meeting all 3   | <b>0.09 (0.02–0.50)</b>          | 1.20 (0.48–2.97)                 |

OR: odds ratio; CI: confidence interval; PA: physical activity; ST: screen time. Models are adjusted for sex, ethnicity, subjective socioeconomic status, and body mass index z-score.
